# Supplementary material
Source: PubMed Central journal article supplement (PMC6344611)
Supplement: d1d6ab1e49c0f71e87551d09ab0b4c4f_AEM.02387-18-s0001.pdf [file d1d6ab1e49c0f71e87551d09ab0b4c4f_AEM.02387-18-s0001.pdf]

1 **Analysis of the thermal stability of a mercuric reductase from the Red Sea Atlantis II hot**  
2 **brine environment by site-directed mutagenesis**

3 Mohamad Maged\*<sup>1</sup>, Ahmed El Hosseiny<sup>1</sup>, Mona Kamal Saadeldin<sup>1</sup>, Ramy K. Aziz<sup>2</sup>, and Eman  
4 Ramadan<sup>3</sup>

5  
6 <sup>1</sup>Department of Biology and the Science and Technology Research Center, School of Sciences  
7 and Engineering, The American University in Cairo, AUC Avenue, P. O. Box 74, New Cairo  
8 11835, Egypt

9 <sup>2</sup>Department of Microbiology and Immunology, Faculty of Pharmacy, Cairo University, 11562,  
10 Cairo, Egypt

11 <sup>3</sup>Faculty of Pharmacy, The British University in Egypt (BUE), El Sherouk City, Misr- Ismailia  
12 Desert Road, Egypt

13 \*To whom correspondence should be addressed:

14 Mohamad Maged

15 E-mail address: mohamadmaged@aucegypt.edu

16

17 **Supplementary Figures**

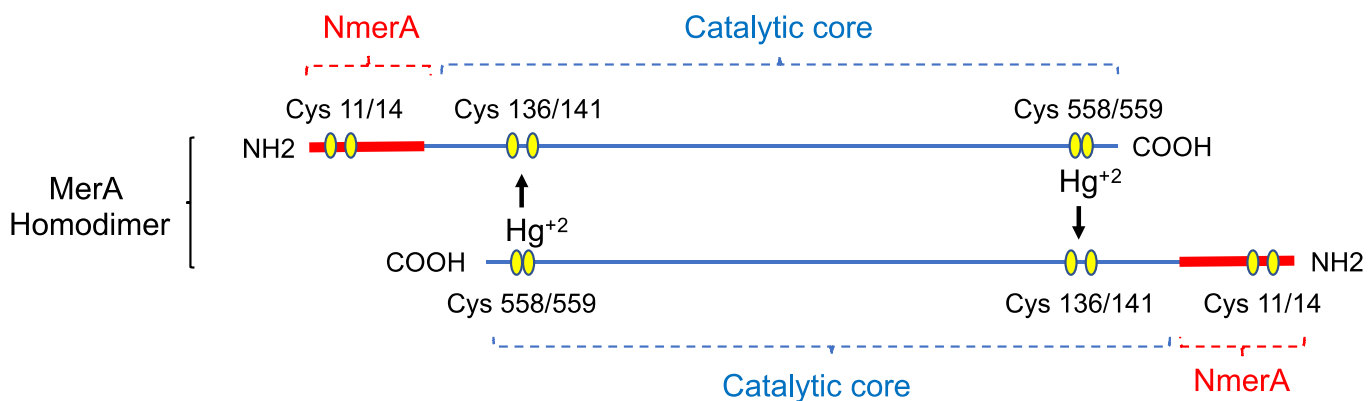

18

19 **Fig. S1. Cartoon showing the structure of mercuric reductase dimer and the binding and**  
20 **catalytic sites.**

21 This simplified diagram represents the structure of the mercuric reductase homodimer. The six  
22 pairs of cysteines in the merA homodimer are highlighted in yellow, and the N-terminal domain  
23 is highlighted in red. Cys 11/14 pair serves to bind Hg<sup>2+</sup> and transfer it from ligands in the  
24 cytoplasm to the redox-active cysteines for reduction under physiological conditions in which  
25 intercellular thiols are depleted. Cys 136/141 pair is the redox-active cysteine involved in  
26 catalysis. Cys 558/559 pair binds Hg<sup>2+</sup> and transfers it to the active site of the other subunit for  
27 reduction.

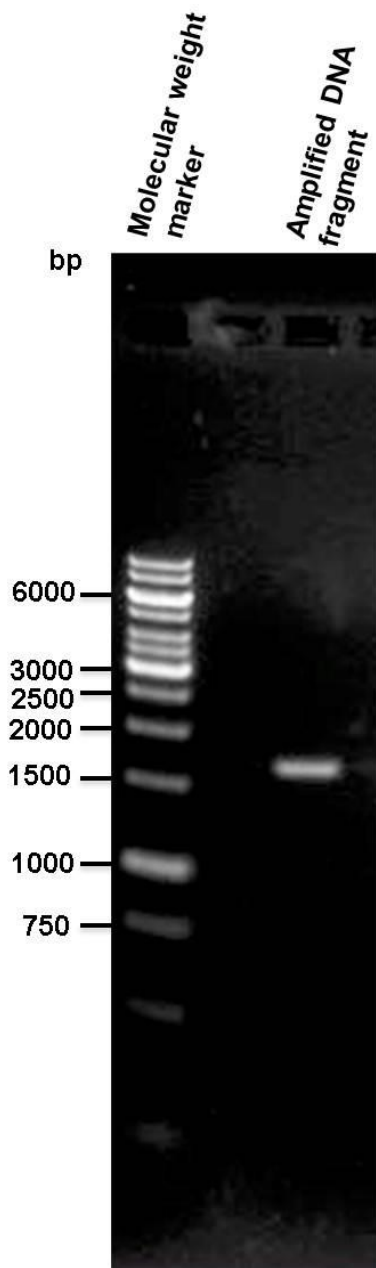

28

29 **Fig. S2. PCR amplification of metagenomic Atlantis-II LCL mercuric reductase.**

30 Products of PCR amplification of ATII-LCL metagenomic DNA analyzed on 1% agarose gel  
31 electrophoresis. Lane 1, molecular weight marker; Lane 2, amplified DNA fragment.

32

33

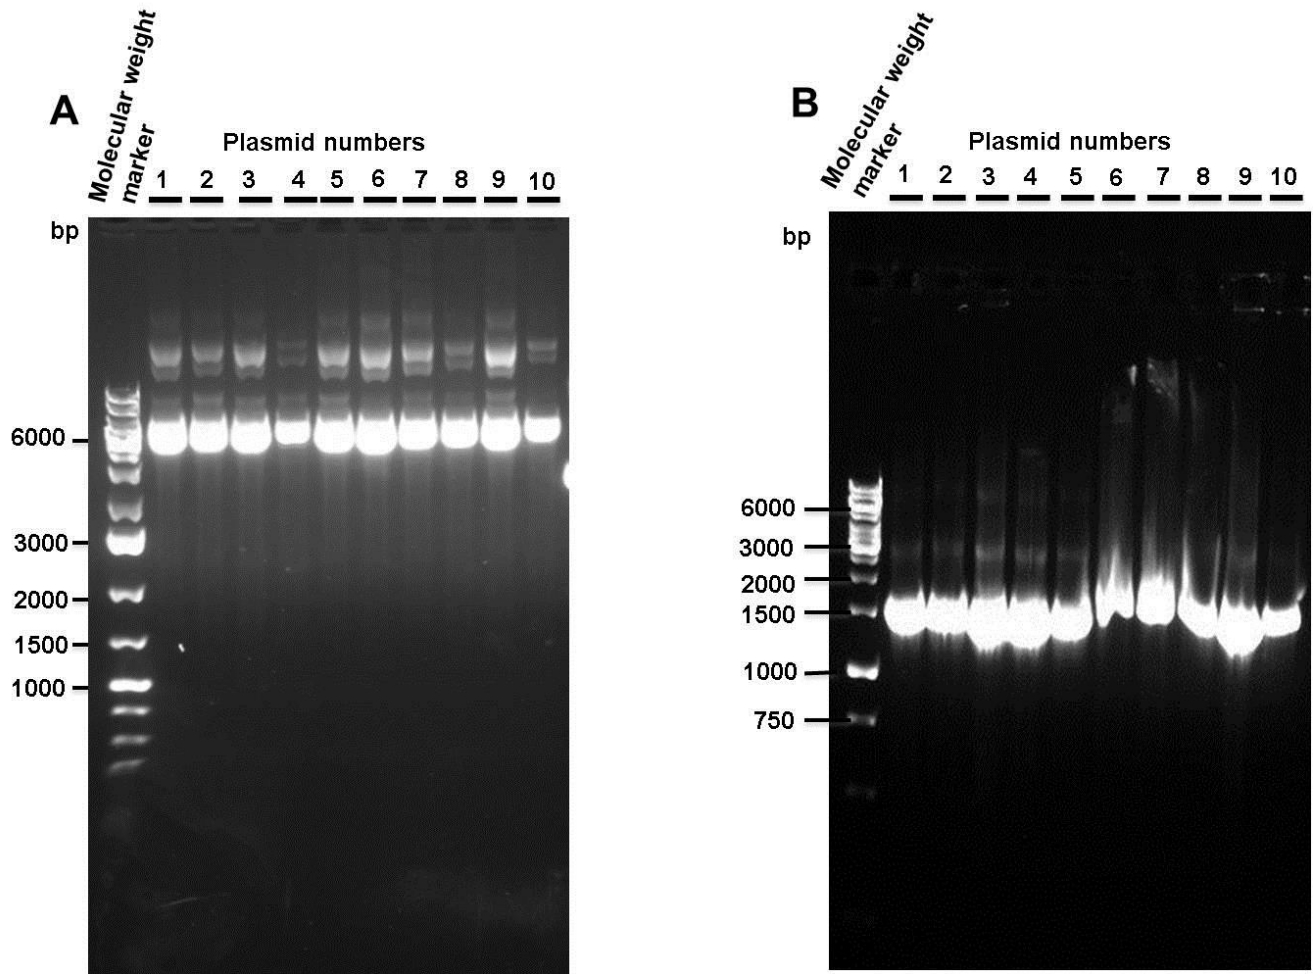

34

35

36 **Fig. S3. Analysis of randomly selected clones from the ATII-LCL *merA* library.**

37 A) Analysis of recombinant plasmids from ten randomly selected clones on 1% agarose gel

38 electrophoresis. B) Analysis of the size of inserted DNA fragments by PCR. PCR parameter and

39 primers used in the amplification process are described in the experimental procedures section.

40 MWM refer to molecular weight marker.

41

42

1 60  
 |-----|  
 ATII-LCL-NH MTHLKITGHTCDSCAAHVKEALEKVPGVQSALVSYPKGTAQLAIVPGTSPDALTAAVAGL  
 2A3 .....  
 2B1 .....  
 2A5 .....  
 2C6 .....  
 2A11 .....  
 2A2 .....  
 2A4 .....

61 120  
 |-----|  
 ATII-LCL-NH GYKATLADAPLADNRVGLLDKVRGHWAAAEKHSGNEPPVQVAVIGSGGAAAMAALKAVEQ  
 2A3 .....  
 2B1 .....  
 2A5 .....  
 2C6 .....  
 2A11 .....  
 2A2 .....  
 2A4 .....

121 136 141 180  
 |-----|  
 ATII-LCL-NH GAQVTLIERGTIGGTCVNVGCVPSKIMIRAAHIAHLRRESPFDGGIARTVPTIDRSKLLA  
 2A3 .....  
 2B1 .....  
 2A5 .....  
 2C6 .....P  
 2A11 .....  
 2A2 .....  
 2A4 .....

181 240  
 |-----|  
 ATII-LCL-NH QQQARVDEL RHAKYEGILGGNPAITYVHGEARFKDDQSLTVRLNEGGERVVMFDRCLVAT  
 2A3 .....  
 2B1 .....  
 2A5 .....  
 2C6 .....  
 2A11 .....A  
 2A2 .....  
 2A4 .....A

241 300  
 |-----|  
 ATII-LCL-NH GASPAVPPIPGLKESPYHTSTEALASDTIPERLAVIGSSVVALELAQAFARLGSKVTVLA  
 2A3 .....  
 2B1 .....  
 2A5 .....  
 2C6 .....  
 2A11 .....  
 2A2 .....  
 2A4 .....A

301 360  
 |-----|  
 ATII-LCL-NH RNTLFFREDPAIGEAVTAAFRAEGIEVLEHTQASQVAHMDGEFVLTTHGELRADKLLVA  
 2A3 .....  
 2B1 .....  
 2A5 .....  
 2C6 .....  
 2A11 .....  
 2A2 .....  
 2A4 .....

361 420  
 |-----|  
 ATII-LCL-NH TGRTPNTRSLALDAAGVTYNAQGAIADIDQGHRTSNPNIIYAGDCTDQPQFYVVAARAGTR  
 2A3 .....V.....  
 2B1 .....V.....  
 2A5 .....V.....V.....  
 2C6 .....V.....  
 2A11 .....V.....  
 2A2 .....V.....T.....  
 2A4 .....V.....H.....

421 480  
 |-----|  
 ATII-LCL-NH AAINHTGGDAALDLTAMPVVFYVDPQVATVGYSEAEAHHDGIETDSRTLTLDNVPRALAN  
 2A3 .....  
 2B1 .....  
 2A5 .....  
 2C6 .....  
 2A11 .....  
 2A2 .....S.....  
 2A4 .....

481 540  
 |-----|  
 ATII-LCL-NH FDTRGFIKLVIEEGSHRLIGVQVYVPEAGELIQTAALAIRNRMTVQELADQLFPYLTHVE  
 2A3 .....  
 2B1 .....  
 2A5 .....  
 2C6 .....L.....  
 2A11 .....S.....  
 2A2 .....  
 2A4 .....A.....

541 561  
 |-----|  
 ATII-LCL-NH GLKLAARQTFNKDVKQLSCCAG  
 2A3 .....  
 2B1 .....A.....  
 2A5 .....  
 2C6 .....  
 2A11 .....  
 2A2 .....  
 2A4 .....

44

45

46

47

48 **Fig. S4. Multiple sequence alignment of non-redundant and full-length MerA sequences.**

49 Multiple sequence alignment of eight non-redundant full-length MerA sequences obtained from  
50 the ATII-LCL MerA library were aligned by Multalin (1). The first sequence of the figure,  
51 ATII-LCL-NH, is a MerA sequence identified also in a separate library. The amino acid  
52 variants/substitutions are in red letters. The NmerA domain (2) is underlined in green. The  
53 Dimerization domain (3) is underlined in purple.

54

55

56

57

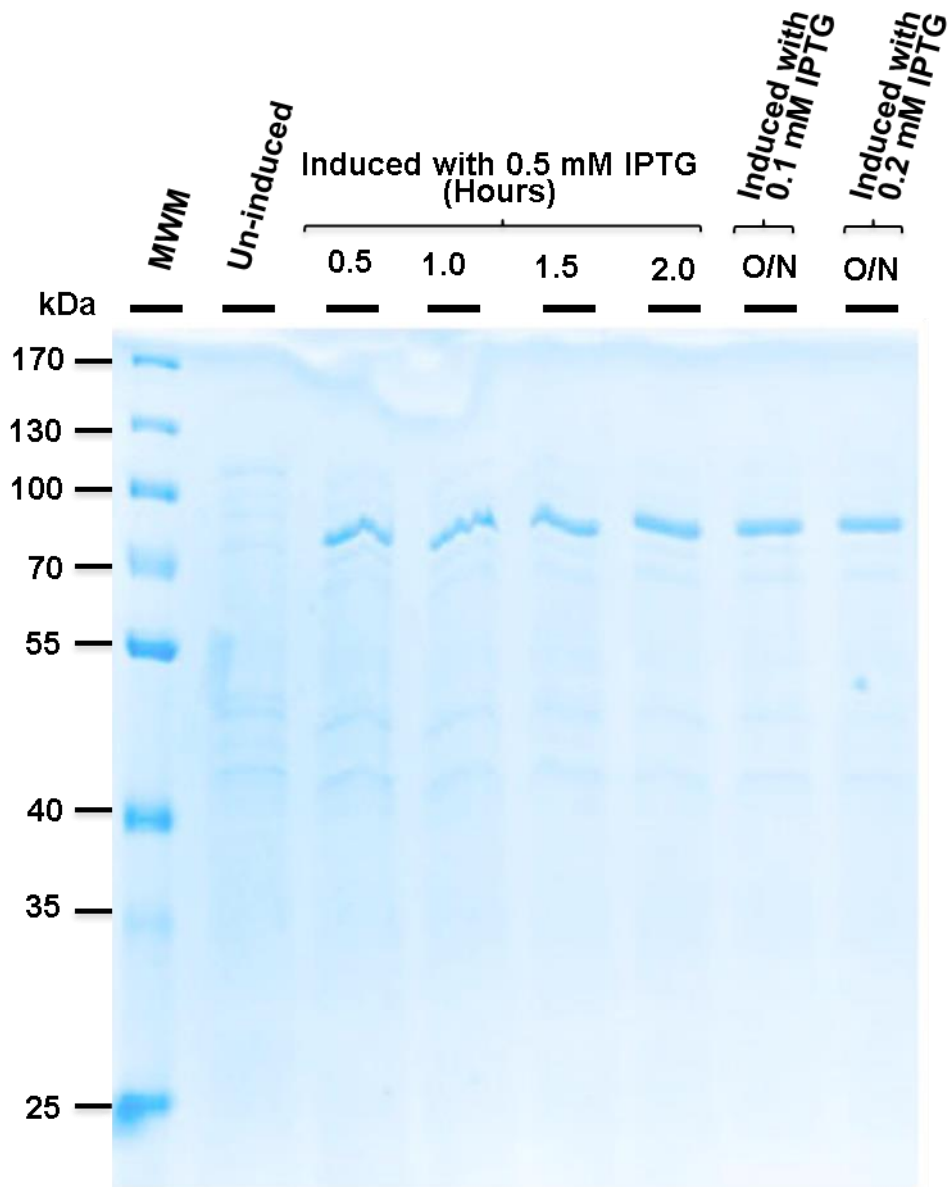

58

59 **Fig. S5. Induction of ATII-LCL-NH MerA at different conditions.**

60 SDS-PAGE 10% of the induced ATII-LCL-NH-merA gene was performed as described in the  
 61 figure. First lane is the molecular weight marker (MWM).

62 .

63



64

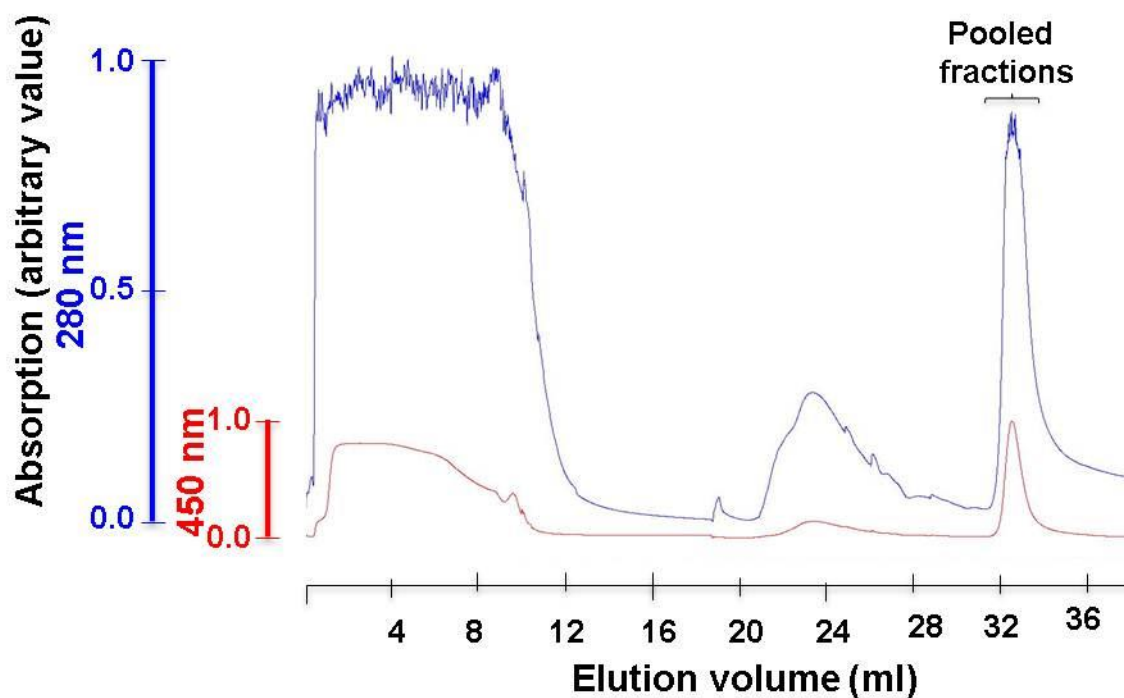

65

66 **Fig. S6. Purification profile of MerA ATII-LCL-NH recombinant enzyme using HisTrap**  
67 **affinity column.**

68 The ATII-LCL-NH *E. coli* cell lysate was uploaded into 1 ml HisTrap column equilibrated with  
69 40 mM imidazole using the AKTA purifier machine. On-line AKTA monitor adjusted at 280 nm  
70 and 450 nm was used to follow the elution profile of proteins and FAD respectively. 250  $\mu$ l  
71 aliquots were collected in each fraction. Elution of the protein was achieved by changing the  
72 buffer to 500 mM imidazole at 28 ml of the elution volume. Pooled fractions containing ATII-  
73 LCL-NH MerA are indicated in the figure.

74

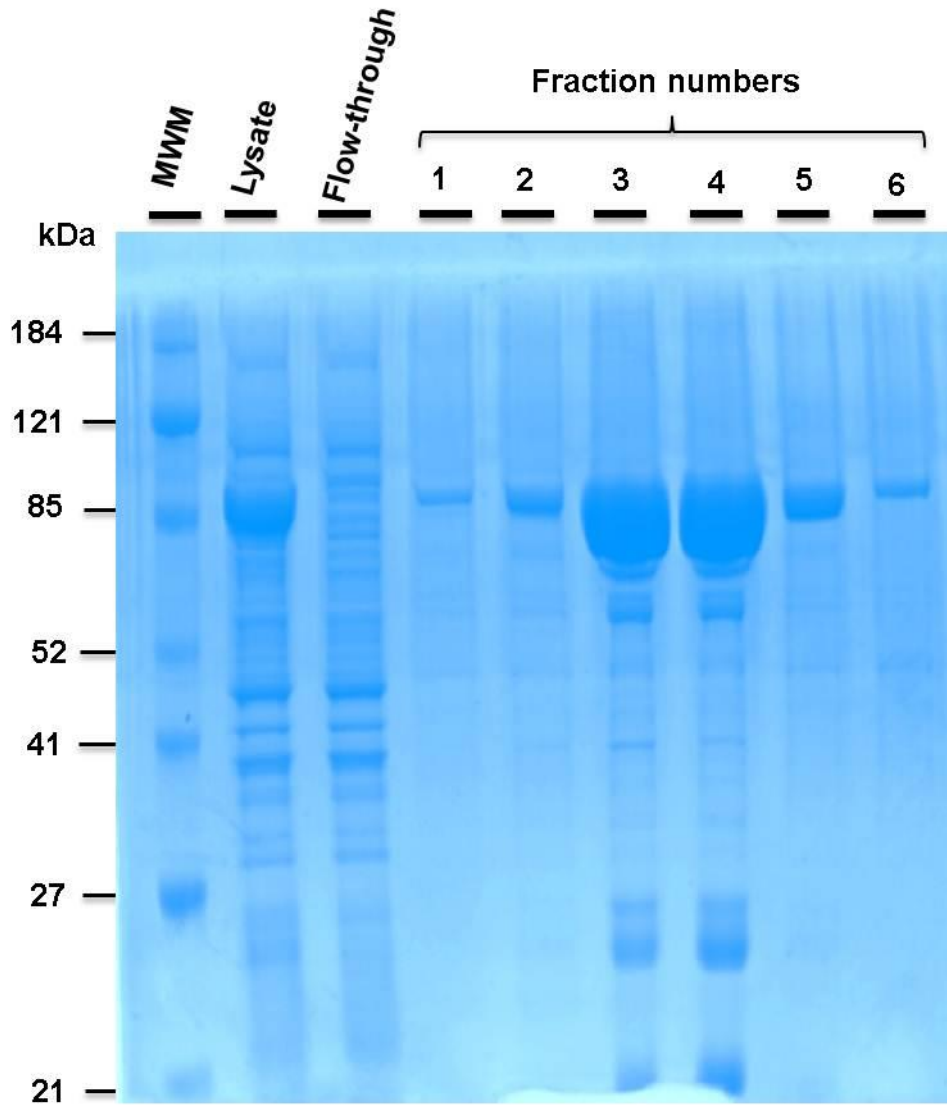

75

76 **Fig. S7. Visualization of the HisTrap purification process by SDS-PAGE.**

77 Aliquots from the HisTrap purification process were analyzed by SDS-PAGE as described in the  
78 experimental procedures. Fractions 1 to 6 refer to the pooled fractions indicated in Fig. S6.

79

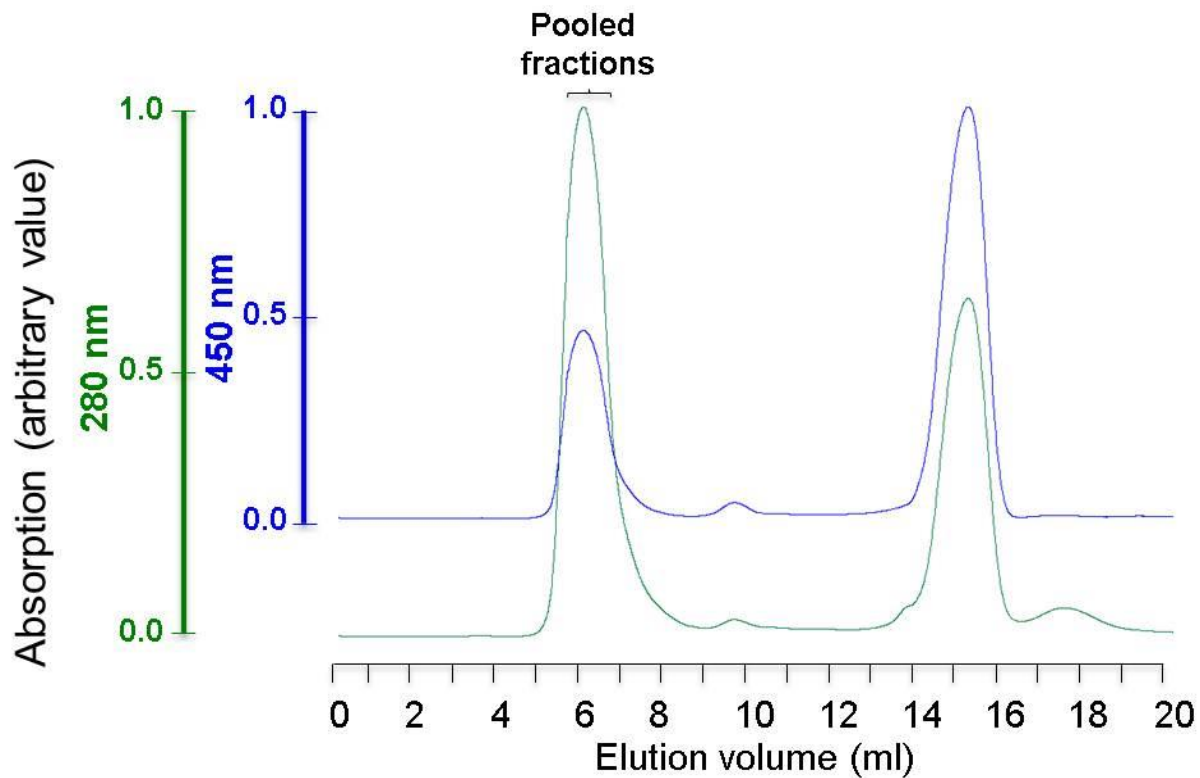

80 .

81 **Fig. S8. Purification profile of MerA ATII-LCL-NH recombinant enzyme on Superdex 75**  
 82 **column.**

83 Pooled fractions from the HisTrap column were uploaded into 24-ml Superdex column  
 84 equilibrated with PBS buffer using the AKTA purifier machine. On-line AKTA monitor adjusted  
 85 at 280 nm and 450 nm was used to follow the profile of elution of proteins and FAD  
 86 respectively. Aliquots, 250  $\mu$ l, were collected. Pooled fractions are indicated in the figure.

87

88

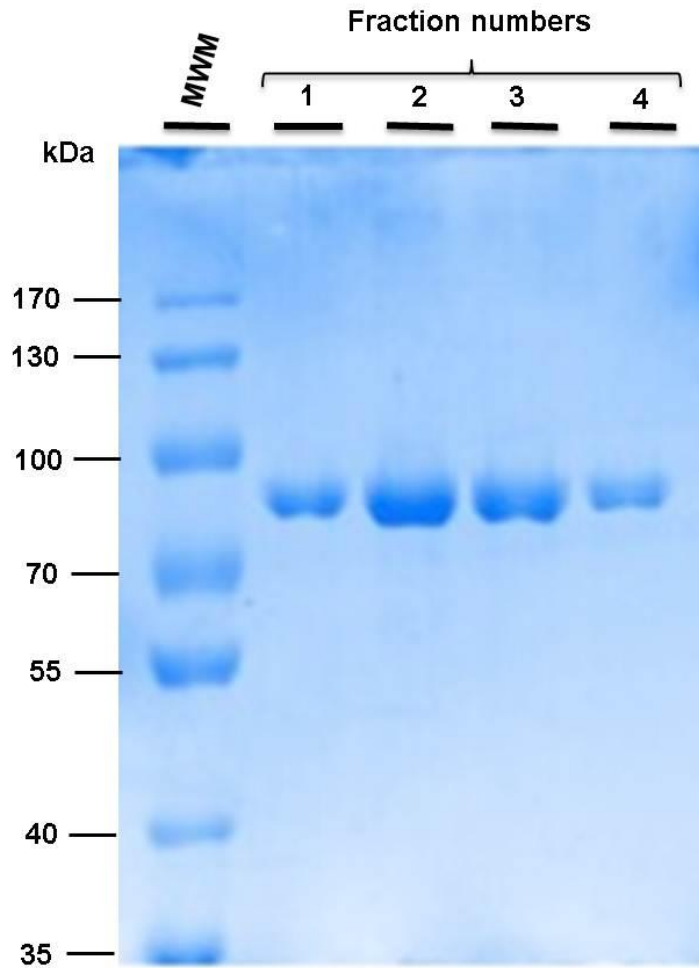

89

90 **Fig. S9. Assessment of Superdex 75 purification process by SDS-PAGE.**

91 Aliquots from the Superdex 75 purification process were analyzed on 10% SDS-PAGE as  
92 indicated in the experimental procedures. Fractions 1 to 4 refer to the pooled fractions indicated  
93 in Fig. S8.

94

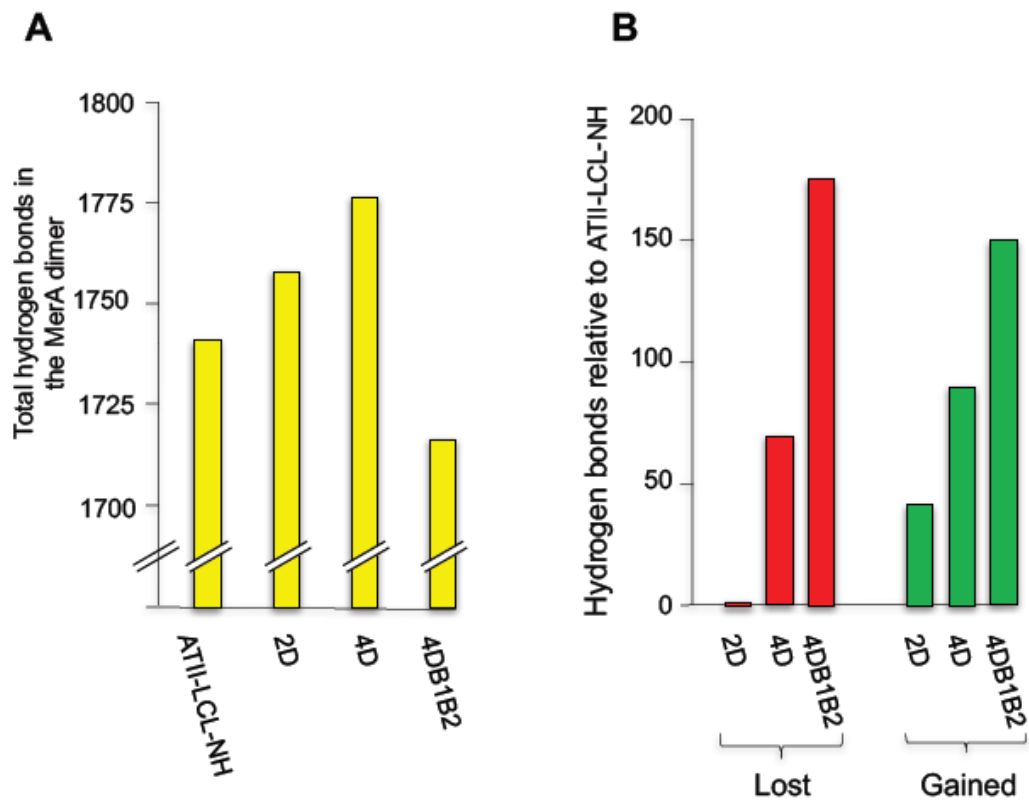

95

96 **Fig. S10. Total hydrogen bonds of ATII-LCL-NH and its mutants.**

97 A) Total hydrogen bonds in the indicated MerAs were calculated by Hydrogen Bond Calculator

98 version 1.1 (4). B) The loss and gain of hydrogen bonds in each MerA indicated in the figure

99 were computationally calculated.

100

101

102

103

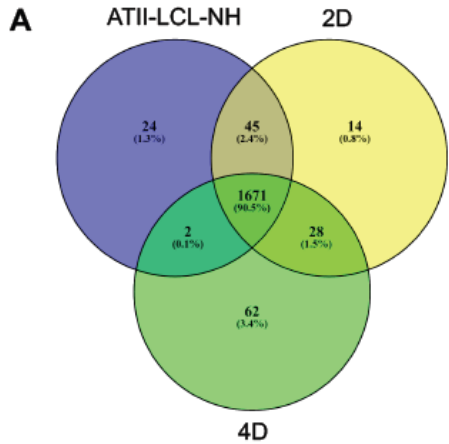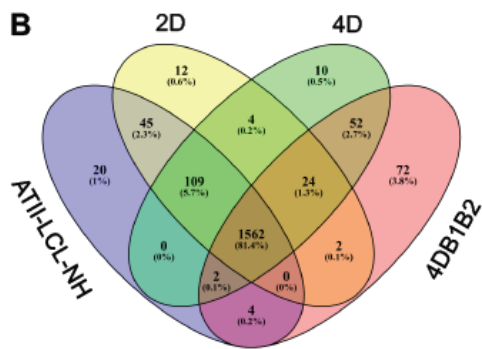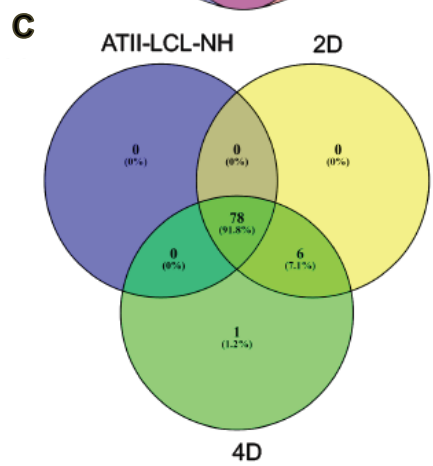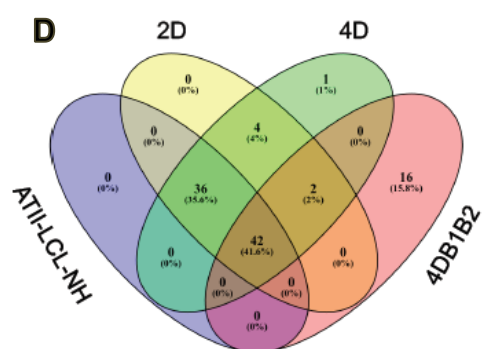

104

105

106 **Fig. S11. Venn diagram of hydrogen bonding and salt bridges in ATII-LCL-NH**  
107 **and its mutants.**

108 Venn diagrams of total hydrogen bonds and salt bridges in ATII-LCL-NH, 2D, and 4D mutants  
109 were created and drawn using Venny software version 2.1 (5). A) Diagram of total potential  
110 hydrogen bonds in ATII-LCL-NH and 2D mutant. B) Diagram of ATII-LCL-NH together with  
111 2D, 4D, and 4DB1B2 mutants. C) A Venn diagram of total potential salt bridges in ATII-LCL-  
112 NH and 2D mutant. D) Diagram of ATII-LCL-NH together with 2D, 4D, and 4DB1B2 mutants.

113

114

115

116

117

118

119

120

121

```

001 Input_pdb_SEORES_A      L D A A G V T V N A Q - G A I V I D Q G M R T S N P N I Y A A G D C - - - - T D Q P - Q F V Y V A A
002 UniRef90_Q51772_86_548  L D A P G V T V N A Q - G A I V I D Q G M R T S N P N I Y A A G D C - - - - T D Q P - Q F V Y V A A
003 UniRef90_A0A2S5LUM8_99_561 L D A A G I T V N L Q - G A I V I D P G M R S S V E H I Y A A G D C - - - - T D Q P - Q F V Y V A A
004 UniRef90_A0A2N1XUH0_8_470  L E A A G V A V N T Q - G A I V I D Q G M R T S T P H I Y A A G D C - - - - T D Q P - Q F V Y V A A
005 UniRef90_U2HNM8_98_560    L E A A G V V V N K Q - G A I E I D P G M R T S A P D I Y A A G D C - - - - T D Q P - Q F V Y V A A
006 UniRef90_A0A2S0MY95_14_475 L E A A G V A I D A Q - G A I A I D T G M R T S A P H I Y A A G D C - - - - T D L P - Q F V Y V A A
007 UniRef90_A0A0M1EG14_101_564 L D A A G V V V N A Q - G A I T I D H A M R T T V P H I Y A A G D C - - - - T D Q P - Q F V Y V A A

```

Four Alanines 414-417

```

001 Input_pdb_SEORES_A      A A G T R A A I N M T - - - - G G - - - D A A L D - - L T A M P A V V F T D P Q V A T V G Y S E A
002 UniRef90_Q51772_86_548  A A G T R A A I N M T - - - - G G - - - D R A L N - - L T A M P A V V F T D P Q V A T V G Y S E A
003 UniRef90_A0A2S5LUM8_99_561 A A G T R A A I N M T - - - - G G - - - D A A I D - - L T A M P A V V F T D P Q V A T V G Y S E A
004 UniRef90_A0A2N1XUH0_8_470  A A G T R A A I N M T - - - - G G - - - D A A L D - - L S A M P A V V F T D P Q V A T V G Y S E A
005 UniRef90_U2HNM8_98_560    A A G T R A A L N M T - - - - G G - - - D A A L D - - L T A V P A V V F T D P H V A T V G L S E Q
006 UniRef90_A0A2S0MY95_14_475 A A G T R A A I N M T - - - - G G - - - D A A I D - - L A A M P A V V F T D P Q V A T V G R S E A
007 UniRef90_A0A0M1EG14_101_564 A A G T R A A I N M T - - - - G G - - - N A T L D - - L T A M P A V V F T D P Q V A T V G Y S E A
008 UniRef90_A0A0J8PU16_99_562 A A G T R A A I N M T - - - - G G - - - D A A L D - - L T A M P A V V F T D P Q V A T V G Y S E A

```

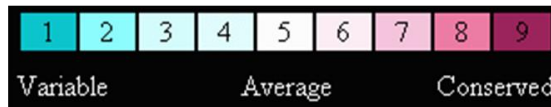

122

123

124 **Fig. S12. ConSurf Alignment of ATII-LCL-NH MerA model and homologous mercuric**  
 125 **reductases.**

126 ConSurf software (6) was used to calculate and analyse the evolutionary conservation of every  
 127 amino acid. Ala 414 is highlighted in dark purple indicating its highest conservation among  
 128 homologous mercuric reductase enzymes, while Ala 416 is highlighted in white denoting its  
 129 average variability. A color-coded key is provided.

130

131

132

133

134

135

136

137

138



139 **Supplementary figures references**

140

141 1. Corpet F. 1988. Multiple sequence alignment with hierarchical clustering. *Nucleic*  
142 *Acids Res* 16:10881-90.

143 2. Ledwidge R, Hong B, Dotsch V, Miller SM. 2010. NmerA of Tn501 mercuric ion  
144 reductase: structural modulation of the pKa values of the metal binding cysteine  
145 thiols. *Biochemistry* 49:8988-98.

146 3. Zhang Y, Bond CS, Bailey S, Cunningham ML, Fairlamb AH, Hunter WN. 1996.  
147 The crystal structure of trypanothione reductase from the human pathogen  
148 *Trypanosoma cruzi* at 2.3 Å resolution. *Protein Sci* 5:52-61.

149 4. Petsko GA, Ringe D. . 2004. Bonds that stabilize folded proteins, p 10-11,  
150 *Protein Structure and Function*. New Science Press.

151 5. Oliveros JC. 2007-2015. Venny. An interactive tool for comparing lists with  
152 Venn's diagrams. <http://bioinfogp.cnb.csic.es/tools/venny/index.html> Accessed

153 6. Celniker G, Nimrod G, Ashkenazy H, Glaser F, Martz E, Mayrose I, Pupko T,  
154 Ben-Tal N. 2013. ConSurf: Using Evolutionary Data to Raise Testable  
155 Hypotheses about Protein Function. *Israel Journal of Chemistry* 53:199-206.

156
